# Supplementary material for: 3D Printed Hydrogel Microneedle Arrays for Interstitial Fluid Biomarker Extraction and Colorimetric Detection
Source: MDPI journal article supplement (doi:10.3390/polym15061389), 2023-03-10
Supplement: s1 [file s1]

Article

# 3D Printed Hydrogel Microneedle Arrays for Interstitial Fluid Biomarker Extraction and Colorimetric Detection

Mahmood Razzaghi <sup>1</sup>, Amir Seyfoori <sup>1</sup>, Erik Pagan <sup>1</sup>, Esfandiyar Askari <sup>1</sup>, Alireza Hassani Najafabadi <sup>2</sup> and Mohsen Akbari <sup>1,2,3,\*</sup>

<sup>1</sup> Laboratory for Innovations in Microengineering (LiME), Department of Mechanical Engineering, University of Victoria, Victoria, BC V8P 5C2 Canada

<sup>2</sup> Terasaki Institute for Biomedical Innovations, Los Angeles, CA 90050, USA

<sup>3</sup> Biotechnology Center, Silesian University of Technology, Akademicka 2A, 44-100 Gliwice, Poland

\* Correspondence: makbari@uvic.ca

## Support information

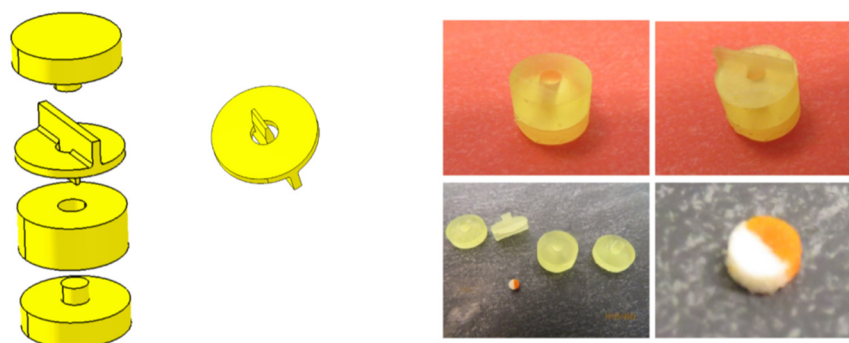

**Figure S1.** A 3D printed device set for making the multiplexed sensor.
